# Supplementary material for: Application of hitherto unexplored macrocyclization strategies in the epothilone series: novel epothilone analogs by total synthesisElectronic supplementary information (ESI) available: experimental details for the synthesis of 14 and 32. See http://www.rsc.org/suppdata/cc/b2/b209941a/
Source: Royal Society of Chemistry journal article supplement (doi:10.1039/b209941a), 2002-10-30
Supplement: b209941a.doc [file b209941a.doc]

**Supplementary data**

Application of Hitherto Unexplored Macrocyclization Strategies in the Epothilone Series: Novel Epothilone Analogs by Total Synthesis

Jon T. Njardarsona, Kaustav Biswasa and Samuel J. Danishefsky**a,b*

To a degassed solution of **13** (10mg, 9.7mol, 1 equiv.) in THF (0.5mL) was added Ag2O (11mg, 47mol, 5 equiv.) follwed by Pd(PPh3)4 (3mg, 0.25mol, 0.25 equiv). This mixture was heated at reflux for 5hours, at which point it was cooled to room temperature, diluted with ether (2mL) and filtered through a Celite plug. The crude reaction mixture was purified using silica gel chromatograph employing 10% EtOAc/Hexanes as the eluent affording **14** in 35% yield (2.6mg, 3,4mol) as a clear oil. Diene 14 was identical in all respect to diene **14** reported in: Biswas, K.; Lin, H.; Njardarson, J. T.; Chappell, M. D.; Chou, T-C.; Guan, Y.; Tong, W. P.; He, L.; Horwitz, S. B.; Danishefsky, S. J. *J. Am. Chem. Soc.* 2002, **124**, 9825.

To flame dried flask were added CrCl2 (642mg, 5.22mmol, 100 equiv) and NiCl2 follwed by **31** (45mg, 0.052mmol, 1 equiv) dissolved in a degassed mixture of DMF (3.9mL) and THF (1.3mL). The reaction mixture was stirred at room temperature for 5 hours. At this point it was essential for good mass recovery to follow Kishis serine based workup procedure as described in: Stamos, D. P.; Sheng, C.; Chen, S. S. and Kishi, Y. *Tetrahedron Lett.* **1997**, *38*, 6355-6358. The reaction mixture was diluted with EtOAc (20mL) and stirred with 1M solution of sodium serinate for 30 min (colour changes to deep purple). The aqueous phase was extracted twice with EtOAc (20mL) and the combined organic phases were dried over Na2SO4 and concentrated. Silica gel chromatography (20% EtOAc/Hexanes) afforded **32** in 40% yield (15.3mg, 0.021mmol).
